# Supplementary material
Source: publisher figshare collection journal article supplement (https://acs.figshare.com/ndownloader/files/4137214)
Supplement: Supplementary file 1 [file 4137214]

# Correlation of Structure and Function in the Human Hotdog-fold Enzyme hTHEM4.<sup>†</sup>

Hong Zhao<sup>α</sup>, Kap Lim<sup>σ</sup>, Anthony Choudry<sup>γ</sup>, John A. Latham<sup>α</sup>, Manish C. Pathak<sup>β</sup>,  
Dennis Dominguez<sup>α</sup>, Lusong Luo<sup>γ\*</sup>, Osnat Herzberg<sup>β,σ\*</sup> and Debra Dunaway-  
Mariano<sup>α\*</sup>

<sup>α</sup>*Department of Chemistry and Chemical Biology, University of New Mexico, Albuquerque, NM;*

<sup>β</sup>*Center for Advanced Research in Biotechnology and Institute for Bioscience and Biotechnology  
, University of Maryland, Rockville, Maryland; <sup>γ</sup>Enzymology and Mechanistic Pharmacology  
Oncology CEDD, GlaxoSmithkline, Collegeville, PA*

Sixteen pages containing experimental protocol and Table SI1, Table SI2 and Figures SI1-5.

## ***Experimental***

### *Preparation of Enzymes.*

His<sub>6</sub>-tagged recombinant full-length hTHEM4 and the N-terminal truncated ( $\Delta$ 1-39)hTMEM4 were prepared from the *E. coli* clones as reported in reference (1). His-tagged full-length Akt1 was expressed and purified from baculovirus and activated with purified PDK1 to phosphorylate Thr<sup>308</sup> and purified MK2 to phosphorylate Ser<sup>473</sup> according to published procedure (2). Akt1 used in the pull-down experiments was prepared using the *E. coli* clone and His<sub>6</sub>-MBP TEV protease cleavable tag according to the protocols described in reference (3). The cDNA clone of the gene *AKT1* (BC000479) encoding full length Akt1 was purchased from Thermo Scientific (MHS1011-58771). The gene was inserted into the Addgene plasmid 11540: pHM6g.TM1457 (to produce the His<sub>6</sub>-MBP TEV protease cleavable construct) cleaved using NdeI and BamHI.

### *Site-directed Mutagenesis*

Site-directed mutagenesis was carried out using a PCR-based strategy with the ( $\Delta$ 1-39)hTHEM4/pET-23a (+) plasmid as template, commercial primers and dNTP (Invitrogen), *Pfu Turbo* DNA polymerase, and the Techgene thermal cycler manufactured by TECHNE (Princeton, NJ). The PCR products were treated with DpnI to remove the wild type plasmid before transformation into competent *Escherichia coli* cells (BL21 Star<sup>TM</sup> (DE3) One Shot). The sequence of the mutated gene was confirmed by DNA sequencing carried out by the DNA Sequencing Facility of the Health Sciences Center in the University of New Mexico, the plasmid was prepared using a QIAprep Spin Miniprep Kit (Qiagen). The hTHEM4 mutants were purified to homogeneity (monitored by SDS-PAGE) by the same procedure used to purify the wild-type enzyme.

### *hTHEM4 Native Molecular Weight Determination*

The association states of full-length and ( $\Delta$ 1-39) hTHEM4 were determined at the Biophysics Resource of Keck Facility (Yale University) using HPLC (High Performance Liquid Chromatography) SEC (Size Exclusive Chromatography) (LS) Light Scattering (RI) Refractive Index analysis to.

#### *Crystal structure determination*

Crystals of hTHEM4 were obtained by vapor diffusion in hanging drops at room temperature. The reservoir solution contained 11 % w/v PEG 3350 and 0.1 M ammonium phosphate monobasic in the case of hTHEM4. The protein sample, kept in 0.2 M NaCl and 50 mM HEPES, pH 7.5, was mixed with the enzyme inhibitor undecan-2-one-CoA to a final protein concentration of 8 mg/mL and inhibitor concentration of 4 mM. Equal volumes of the protein solution and reservoir solution were equilibrated with the reservoir solution. Needle-like crystals of hTHEM4 appeared within three days (approximate dimensions 0.8 x 0.02 x 0.02 mm<sup>3</sup>). The crystals were transferred to a mother liquor solution supplemented with 20% glycerol and flashed-cooled in propane cooled with liquid nitrogen.

X-ray diffraction data were collected at the GM/CA-CAT 23-ID beamline at the Advanced Photon Source, Argonne National Laboratory. The beamline was equipped with a MAR 300 CCD detector. Data were processed with the program CrystalClear (Rigaku). The lattice parameters and the space group indicated that the crystals contained 49% solvent and two molecules in the asymmetric unit.

PSI-BLAST (4) showed that the closest hTHEM4 sequence homolog in the PDB is a protein from *Rhodococcus* sp. with a hotdog fold (E score of  $10^{-7}$ , PDB entry code 2OV9, determined by the Midwest Center for Structural Genomics), although the protein function has not been

defined. This structure was used as the search model to determine the hTHEM4 structure by the Molecular Replacement method. The PSI-BLAST sequence alignment spanned the hTHEM4 residues 142 to 231 corresponding to most of the *Rhodococcus* thioesterase hotdog core fold (residues 121 to 208) with 33 % amino acid identity. The N-terminal region of hTHEM4 (residues 39 – 120) has no identifiable homolog with known structure.

Molecular Replacement was performed with the PHASER program (5,6) and the dimeric *Rhodococcus* sp. thioesterase search model was truncated to include the entire hotdog core fold (residues 101-209). A single solution was readily obtained, with the dimer occupying the crystal asymmetric unit. The initial model was energy minimized with Refmac (7) followed by a non-crystallographic averaging and solvent-flattening using Resolve (8).

Building of the missing N-terminal polypeptide chain was accomplished gradually by repeated cycles of model building with Coot (9) and phase improvement with Resolve (8). The electron density map also showed a bound undecan-2-one-CoA inhibitor in each active site and these were modeled once the building of the polypeptide chain was completed. Final refinements cycles and positioning of water molecules were performed with the Phenix program (10). The structure refinements summary is provided in Table SII.

#### *hTHEM4 Thioesterase Activity Assay*

Reaction solutions were monitored at 412 nm. The reactions were initiated by adding hTHEM4 to solutions initially containing substrate (at varying concentration: 1-10 fold  $K_m$ ), DTNB (2 mM), KCl (0.2 M) and 50 mM  $K^+$ HEPES (pH 7.5, 25 °C). The kinetic parameters  $V_{max}$  and  $K_m$  were determined from initial velocity data, measured as a function of substrate concentration, by

using equation (1) and KinetAsyst (IntelliKinetics, PA),

$$V = V_{\max}[A] / ([A] + K_m) \quad (1)$$

where [A] is the substrate concentration, V is the initial velocity,  $V_{\max}$  is the maximum velocity and  $K_m$  is the Michaelis constant. The  $k_{\text{cat}}$  was calculated from the ratio of  $V_{\max}$  and the total enzyme concentration. The enzyme concentration was determined using the Bradford method.

#### *hTHEM4 Inhibition*

Competitive inhibition constants for undecan-2-one-CoA, hexanoate, octanoate and lauroate were determined by measuring the initial velocity of hTHEM4 catalyzed substrate hydrolysis as a function of substrate concentration ( $K_m$  to  $10K_m$ ) and inhibitor concentration (0,  $1K_i$  and  $2K_i$ ). The initial velocity data were fitted to equation (2) using KinetAsyst (IntelliKinetics, PA),

$$V = V_{\max}[A] / ([A] + K_m (1 + [I]/K_i)) \quad (2)$$

where [A] is the substrate concentration, V is the initial velocity,  $V_{\max}$  is the maximum velocity,  $K_m$  is the Michaelis constant,  $K_i$  is the competitive inhibition constant and [I] is the inhibitor concentration. Because the DTNB-based kinetic assay that is used to measure the initial velocities of hTHEM4 catalyzed acyl-CoA thioester hydrolysis is not compatible with experiments using exogenous CoASH as a product inhibitor, an alternate assay method was employed. Accordingly, 4-hydroxybenzoyl-CoA (4-HBA-CoA) ( $k_{\text{cat}} = 2.9 \pm 0.2 \times 10^{-1} \text{ s}^{-1}$  and  $K_m = 29 \pm 4 \text{ } \mu\text{M}$ ) was used as substrate because its hydrolysis can be monitored by measuring the decrease in absorbance at 300 nm ( $\epsilon = 11.8 \text{ mM}^{-1} \bullet \text{ cm}^{-1}$ ).

#### *Akt1 Kinase Activity Assay*

The catalytic activity of activated, full-length Akt1 (*I*) was measured using GSK3a peptide (RPRAATF) and ATP as substrates in the presence or absence of hTHEM4. Reaction buffer containing 25 mM MOPS, 0.5 mM CHAPS, 10 mM MgCl<sub>2</sub>, 50 mM KCl, 1 mM DTT and 0.1 mg/mL BSA (pH 7.5) was used to prepare Akt1, GSK3a, ATP and hTHEM4 solutions. To a non-binding surface plate, 10 µL of the GSK3a (10 µM) and <sup>33</sup>P-ATP (50 µM) mix were added along with 10 µL of hTHEM4 (0-6 µM) solution. The reaction was initiated by the addition of 20 µL of Akt1 (1 nM) and terminated at 0, 5, 15, 30, 60, 120, 180 and 240 min by adding 40 µL of 1% H<sub>3</sub>PO<sub>4</sub> to the plate. After 10 min, 60 µL of the quenched reaction solution was transferred to a Millipore MAPH filter plate. After 30 min the filter plate was washed 5-times with 100 µL of 1% H<sub>3</sub>PO<sub>4</sub> and then the filter plate was dried at 50°C for 30 min. Next, 50 µL of Microscint20 cocktail was added and the plate was read in TopCount using a <sup>33</sup>P protocol.

#### *Co-Immunoprecipitation of recombinant full-length Akt1 and hTHEM4*

Anti-Akt1 antibody (Cell Signaling #9272) covalently immobilized agarose beads were prepared following the manufacturer's instructions (Thermo Scientific #26148:Pierce Direct IP Kit). Briefly, 20 µg of the Akt1 antibody were incubated with 40 µL of the agarose bead slurry in the presence of NaCNBH<sub>3</sub> at room temperature for at least 2 h. The uncoupled antibody was removed by extensive washing with wash buffer and the uncoupled reactive sites in agarose beads were quenched by incubation with the primary amine and NaCNBH<sub>3</sub>. Purified recombinant full-length Akt1(150 µg) (3) and full-length hTHEM4 (35 µg) were incubated with the anti-Akt1 antibody immobilized agarose beads in 600 µL of IP lysis buffer at 4°C for 12 h. As a control, the same amount of hTHEM4 was incubated with the anti-Akt1 antibody immobilized agarose beads in the absence of Akt1. Unbound or weakly bound protein was removed by using

washing steps prior to eluting the specifically bound protein from the beads with the elution buffer (10 mM Tris with 100 mM glycine pH 7.4). Protein samples were separated by SDS-PAGE before being transferred to a nitrocellulose membrane, which was then incubated for 12 h with the anti-Akt1 (Cell Signaling) or anti-THEM4 (Abnova, H00117145-B01) antibody at 4°C. After extensive washing, the membrane was treated with anti-mouse HRP and anti-rabbit HRP antibody (Invitrogen). Chemiluminescence was carried out using enhanced chemical luminescent reagent (PerkinElmer). The image was obtained by exposing the membrane to Kodak Biomax light film (Sigma-Aldrich).

## References

1. Zhao, H., Martin, B. M., Bisoffi, M., and Dunaway-Mariano, D. (2009) The Akt C-terminal modulator protein is an acyl-CoA thioesterase of the Hotdog-Fold family, *Biochemistry* 48, 5507-5509.
2. Rhodes, N., Heerding, D. A., Duckett, D. R., Eberwein, D. J., Knick, V. B., Lansing, T. J., McConnell, R. T., Gilmer, T. M., Zhang, S. Y., Robell, K., Kahana, J. A., Geske, R. S., Kleymenova, E. V., Choudhry, A. E., Lai, Z., Leber, J. D., Minthorn, E. A., Strum, S. L., Wood, E. R., Huang, P. S., Copeland, R. A., and Kumar, R. (2008) Characterization of an Akt kinase inhibitor with potent pharmacodynamic and antitumor activity, *Cancer Res.* 68, 2366-2374.
3. Tropea, J.E., Cherry, S., Nallamsetty, S., Bignon, C., Waugh, D.S. (2007) A generic method for the production of recombinant proteins in *Escherichia coli* using a dual His<sub>6</sub>-MBP affinity tag, *Methods Mol Biol.* 363, 1-19.
4. Altschul, S. F., Gish, W., Miller, W., Myers, E. W., and Lipman, D. J. (1990) Basic local alignment search tool, *J Mol Biol* 215, 403-410.
5. McCoy, A. J., Grosse-Kunstleve, R. W., Storoni, L. C., and Read, R. J. (2005) Likelihood-enhanced fast translation functions, *Acta Cryst D* 61, 458-464.
6. Storoni, L. C., McCoy, A. J., and Read, R. J. (2004) Likelihood-enhanced fast rotation functions, *Acta Cryst D* 60, 432-438.
7. Murshudov, G. N., Vagin, A. A., and Dodson, E. J. (1997) Refinement of macromolecular structures by the maximum-likelihood method, *Acta Cryst D* 53, 240-255.
8. Terwilliger, T. C. (2000) Maximum likelihood density modification, *Acta Cryst D* 56, 965-972.
9. Emsley, P., and Cowtan, K. (2004) Coot: model-building tools for molecular graphics, *Acta Cryst* 60, 2126-2132.
10. Adams, P. D., Grosse-Kunstleve, R. W., Hung, L. W., Ioerger, T. R., McCoy, A. J., Moriarty, N. W., Read, R. J., Sacchettini, J. C., Sauter, N. K., and Terwilliger, T. C.

- (2002) PHENIX: building new software for automated crystallographic structure determination, *Acta CrystD*58, 1948-1954.
11. Ramachandran, G. N., Ramakrishnan, C., and Sasisekharan, V. (1963) Stereochemistry of polypeptide chain configurations, *J Mol Biol*7, 95-99.
  12. Laskowski, R. A., MacArthur, M. W., Moss, D. S., and Thornton, J. (1993) PROCHECK: a program to check the stereochemical quality of protein structures, *J Appl Cryst*26, 283-291.



**Table SII.** Summary of X-ray data collection and structure refinement.

---

|                                    |                                 |
|------------------------------------|---------------------------------|
| <i>Data collection</i>             |                                 |
| Space group                        | $P2_12_12_1$                    |
| Cell dimension (Å)                 | $a = 56.6, b = 58.8, c = 135.4$ |
| Wavelength (Å)                     | 0.9202                          |
| Resolution (Å)                     | 2.3                             |
| No. of observed reflections        | 85,318                          |
| Completeness (%) <sup>a</sup>      | 99.8 (99.9)                     |
| No. of unique reflections          | 20,650                          |
| $R_{\text{merge}}$ <sup>b</sup>    | 0.086 (0.331)                   |
| $\langle I/s(I) \rangle$           | 9.5 (3.4)                       |
| Redundancy                         | 4.1 (4.2)                       |
| <br><i>Refinement</i>              |                                 |
| No. of reflections used            | 20,649                          |
| No. of protein atoms               | 2,903                           |
| No. of UNC atoms                   | 120                             |
| No. of water atoms                 | 213                             |
| $R_{\text{cryst}}$ <sup>c</sup>    | 0.198 (0.264)                   |
| $R_{\text{free}}$ <sup>d</sup>     | 0.255 (0.330)                   |
| RMSd from ideal geometry           |                                 |
| Bond length (Å)                    | 0.006                           |
| Bond angle (°)                     | 1.3                             |
| Average B factor (Å <sup>2</sup> ) |                                 |
| Protein                            | 34                              |
| UNC                                | 38                              |
| Water                              | 40                              |
| Ramachandran plot (%) <sup>e</sup> | 91.4, 8.6, 0.0, 0.0             |

---

<sup>a</sup>The values in parentheses are for the highest resolution shell, 2.38-2.30 Å.

$$^b R_{merge} = \sum_{hkl} [(\sum_j |I_j - \langle I \rangle|) / \sum_j |I_j|].$$

<sup>c</sup> $R_{cryst} = \sum_{hkl} |F_o| - |F_c| / \sum_{hkl} |F_o|$ , where  $F_o$  and  $F_c$  are the observed and calculated structure factors, respectively.

<sup>d</sup> $R_{free}$  is computed from 1,001 randomly selected reflections omitted from the refinement.

<sup>e</sup>Ramachandran plot categories are most favored, allowed, generously allowed, and disallowed (11, 12).

**Table SI2.** hHTEM4 native molecular weight determination by SEC-LS/RI/UV.

| RUN                      | PEAK<br>Elution<br>at UV<br>trace (mL) | MW (kDa)<br>Calculated<br>average for<br>the major peak<br>(Mw) | MW (kDa)<br>Calculated<br>range of<br>Mw<br>observed | Sequence<br>Predicated MW<br>for monomer<br>(kDa) | Oligomeric<br>association |
|--------------------------|----------------------------------------|-----------------------------------------------------------------|------------------------------------------------------|---------------------------------------------------|---------------------------|
| Full<br>length<br>hTHEM4 | 15.33                                  | 61                                                              | 60-66                                                | 29                                                | dimer                     |

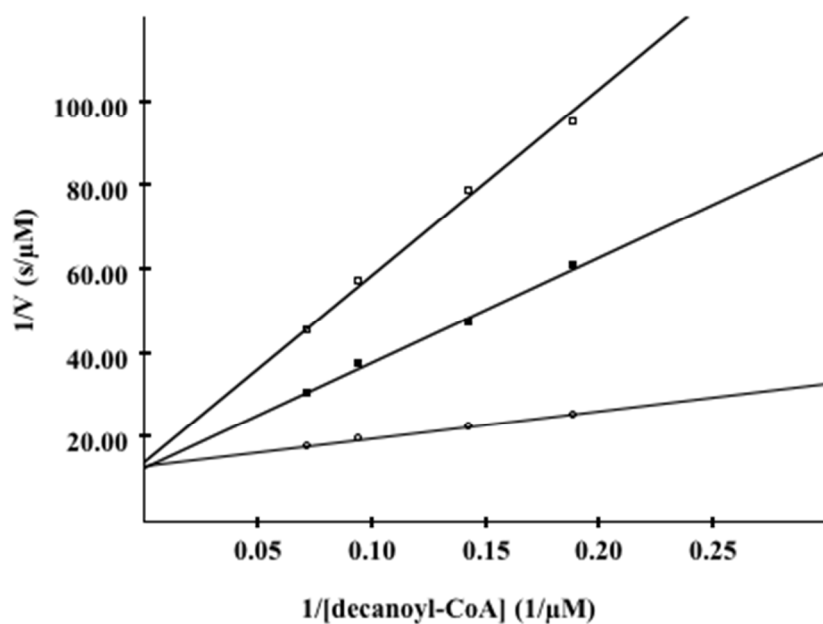

**Figure S11.** Double reciprocal plot of the initial reaction velocity ( $V$ ) vs the concentration of the decanoyl-CoA substrate. Reaction solutions initially contained 5 to 15  $\mu\text{M}$  decanoyl-CoA, 0.02  $\mu\text{M}$  His<sub>6</sub>-hTHEM4, 2 mM DTNB (pH 7.5, 25°C) and 0.0 (O), 2.5 (■) and 5.0  $\mu\text{M}$  (□) undecan-2-one-CoA.

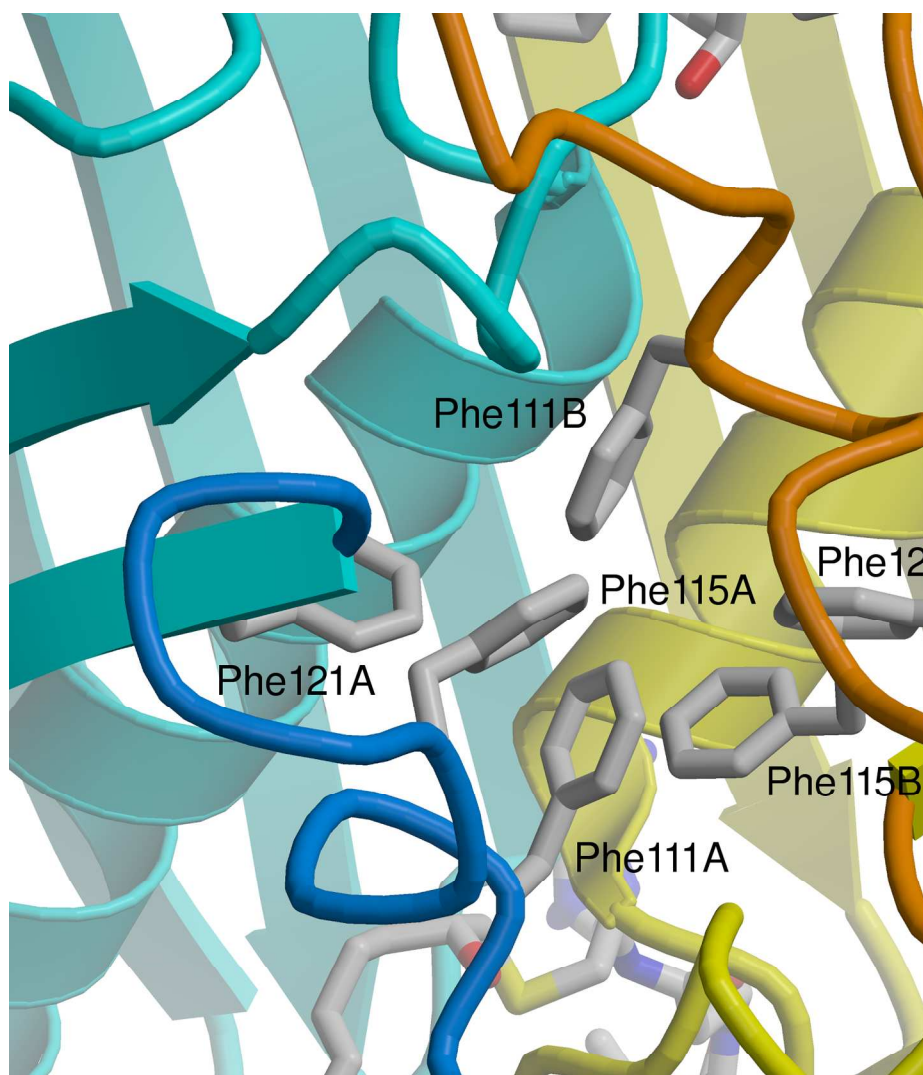

**Figure SI2.** The cluster of Phe residues at the hTHEM4 dimer interface.

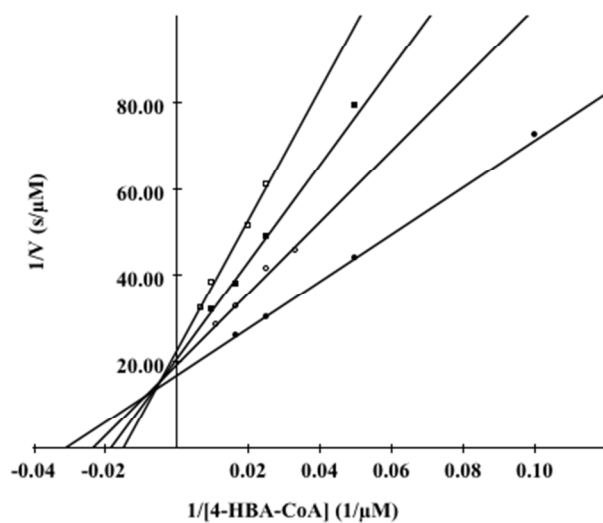

**Figure SI3.** Double reciprocal plot of the initial reaction velocity ( $V$ ) vs the concentration of the 4-hydroxybenzoyl-CoA substrate. Reaction solutions initially contained 10 to 150  $\mu$ M 4-HBA-CoA, 0.3  $\mu$ M hTHEM4, 50 mM HEPES (pH 7.5, 25°C) and 0 (●), 50 (○), 100 (■) and 150 (□)  $\mu$ M CoA.



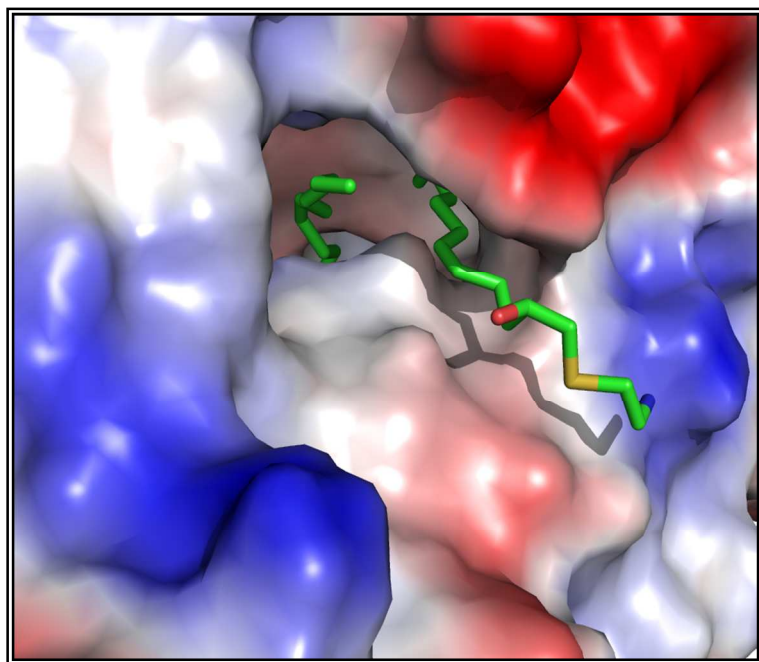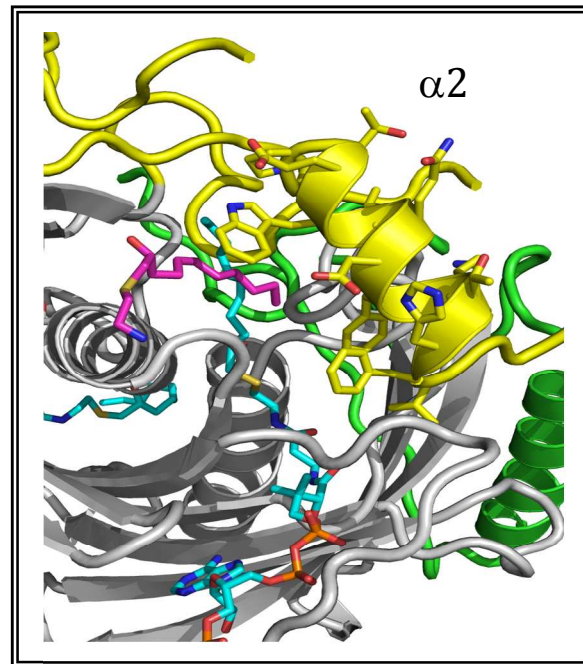

**Figure S15. (Left)** The undecan-2-one-CoA  $C_9-(C=O)-C-S-C-C-N$  fragment shown in stick in relation to the terminal region of the undecan-2-one-CoA ligand (also shown in stick) bound in the substrate-binding site. Undecan-2-one-CoA carbon atoms are colored green, oxygen atoms red, nitrogen atoms blue and sulfur atoms yellow. hTHEM4 surface carbon atoms are colored white, nitrogen atoms blue and oxygen red. **(Right)** Hotdog-fold domains are colored gray, N-terminal domain of subunit A green, N-terminal domain of subunit B yellow. The undecan-2-one-CoA  $C_9-(C=O)-C-S-C-C-N$  fragment is shown in stick with magenta carbon atoms, red oxygen atoms and blue nitrogen atoms. The undecan-2-one-CoA ligand bound in the substrate-binding site is shown in stick with cyan carbon atoms, red oxygen atoms and blue nitrogen atoms. The amino acid side chains of  $\alpha 2$  of subunit B are shown in stick with carbon atoms colored yellow, oxygen atoms red and nitrogen atoms blue.
